# Supplementary material
Source: PubMed Central journal article supplement (PMC4168809)

Hines LA, Sundin J, Rona RJ, et al. Posttraumatic stress disorder post Iraq and Afghanistan: prevalence among military subgroups. *Can J Psychiatry*. 2014;59(9):468–479.

eFigure 1: Flow chart showing paper inclusion numbers

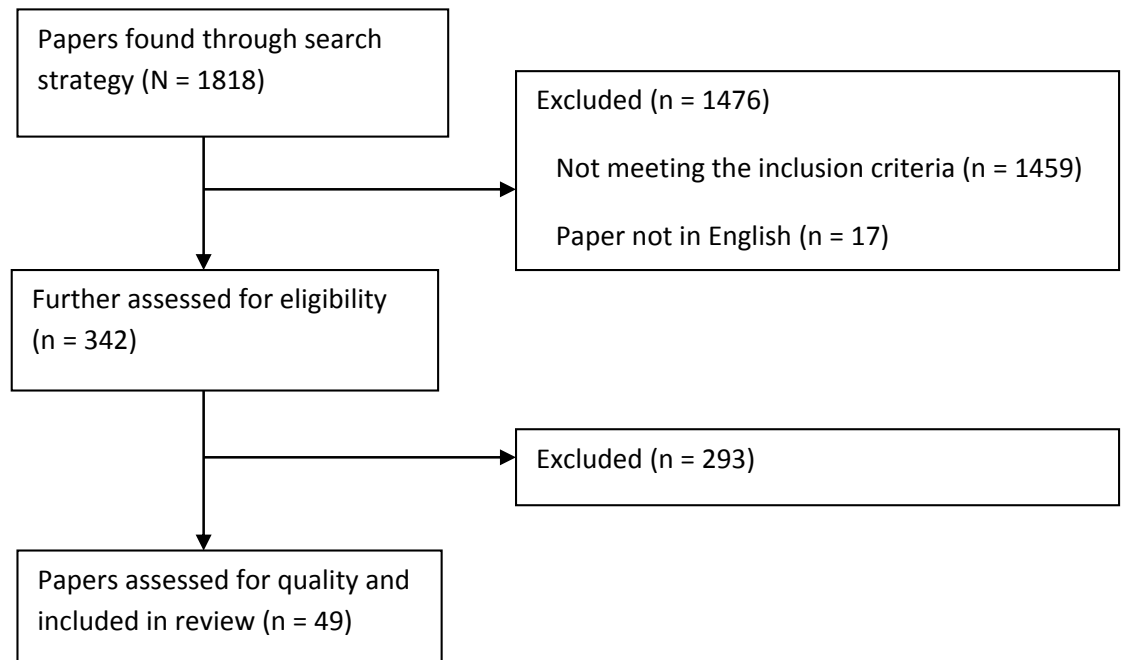

Supplement: CJP-2014-vol59-September-468-479-eFigure1.pdf [file CJP-2014-vol59-September-468-479-eFigure1.pdf]
