# Supplementary material
Source: PubMed Central journal article supplement (PMC4168809)
Supplement: CJP-2014-vol59-September-468-479-eTable1.pdf [file CJP-2014-vol59-September-468-479-eTable1.pdf]

eTable 1. Description and ratings of the 49 papers included in the review.

| <b>Rating criteria</b>         | <b>Scoring</b>                       |                                        |                                            |           |
|--------------------------------|--------------------------------------|----------------------------------------|--------------------------------------------|-----------|
| Type of study                  | 2: cohort or case control            | 1: observations without control        |                                            |           |
| Selection method               | 2: random or representative sampling | 1: Record review or clinic sample      | 0: non-random or convenience sample        |           |
| Main aim to examine PTSD rates | 1: yes                               | 0: no                                  |                                            |           |
| Study design                   | 1: prospective                       | 0: retrospective                       |                                            |           |
| Control group                  | 1: yes                               | 0: no                                  |                                            |           |
| Method of assessing PTSD       | 3: Clinical interview/assessment     | 2: self-report on standardised measure | 1: self-report on non-standardised measure |           |
| Sample Size                    | 3: > 5000                            | 2: 1000-5000                           | 1: 500-1000                                | 0: < 500  |
| Response rate > 60%            | 1: yes                               | 0: no or N/A                           |                                            |           |
| Overall quality                | Very high: > 11                      | High: 9-11                             | Moderate: 6-8                              | Poor: < 6 |

N/A: Not applicable.

| <b>Ref.</b>                   | <b>Type of study</b>             | <b>Selection method</b> | <b>Aimed to examine PTSD rate</b> | <b>PTSD Measure</b> | <b>N</b> | <b>Response rate &gt;60%</b> | <b>Combat role</b> | <b>Gender</b> | <b>Theatre of operation</b> | <b>Country</b> | <b>Quality rating</b> |
|-------------------------------|----------------------------------|-------------------------|-----------------------------------|---------------------|----------|------------------------------|--------------------|---------------|-----------------------------|----------------|-----------------------|
| Adler et al, 2008 (51)        | Cohort/ Case control/ Population | Non-random/ Convenience | Yes                               | PCL Mini            | 202      | No                           | Combat             | Mixed         | Iraq                        | US             | 5                     |
| Allison-Aipa et al, 2010 (52) | Observations without control     | Random/ Representative  | Yes                               | Not listed          | 51078    | Yes                          | Mixed              | Mixed         | Both                        | US             | 8                     |
| Bliese et al, 2007 (87)       | Observations without control     | Non-random/ Convenience | Yes                               | PCL                 | 509      | Yes                          | Combat             | Mixed         | Iraq                        | US             | 7                     |

| Ref.                              | Type of study                          | Selection method           | Aimed to examine PTSD rate | PTSD Measure | N       | Response rate >60% | Combat role | Gender | Theatre of operation | Country     | Quality rating |
|-----------------------------------|----------------------------------------|----------------------------|----------------------------|--------------|---------|--------------------|-------------|--------|----------------------|-------------|----------------|
| Booth-Kewley et al, 2010 (53)     | Cohort/<br>Case control/<br>Population | Non-random/<br>Convenience | Yes                        | PCL          | 1569    | Yes                | Combat      | Mixed  | Both                 | US          | 7              |
| Boulos and Zamorski, 2011 (54)    | Cohort/<br>Case control/<br>Population | Random/<br>Representative  | Yes                        | DSM-IV       | 1934    | Yes                | Mixed       | Mixed  | Afghanistan          | Canada      | 11             |
| Bray et al, 2010 (55)             | Observations without control           | Random/<br>Representative  | Yes                        | PCL          | 28546   | Yes                | Mixed       | Mixed  | Both                 | US          | 11             |
| Cabrera et al, 2007 (56)          | Observations without control           | Non-random/<br>Convenience | Yes                        | PCL          | 4529    | Yes                | Mixed       | Male   | Iraq                 | US          | 9              |
| Castro and McGurk, 2007 (23)      | Cohort/<br>Case control/<br>Population | Non-random/<br>Convenience | Yes                        | PCL          | 577     | Unknown            | Combat      | Mixed  | Iraq                 | US          | 6              |
| Duma et al, 2010 (57)             | Observations without control           | Random/<br>Representative  | Yes                        | PC-PTSD      | 443     | Yes                | Combat      | Mixed  | Both                 | US          | 7              |
| Eisen et al, 2012 (58)            | Observations without control           | Non-random/<br>Convenience | Yes                        | PCL-M        | 596     | No                 | Mixed       | Mixed  | Both                 | US          | 7              |
| Engelhard et al, 2007 (59)        | Observations without control           | Non-random/<br>Convenience | Yes                        | PSS          | 479     | Yes                | Combat      | Mixed  | Iraq                 | Netherlands | 7              |
| Engelhard et al, 2011 (60)        | Observations without control           | Non-random/<br>Convenience | Yes                        | PSS          | 174     | Yes                | Combat      | Male   | Afghanistan          | Netherlands | 7              |
| Fear et al, 2010(10)              | Observations without control           | Random/<br>Representative  | Yes                        | PCL          | 9990    | No                 | Mixed       | Mixed  | Both                 | UK          | 10             |
| Ferrier-Auerbach et al, 2010 (61) | Cohort/<br>Case control/<br>Population | Non-random/<br>Convenience | Yes                        | PCL-M        | 2677    | Yes                | Mixed       | Mixed  | Iraq                 | US          | 7              |
| Highfill-McRoy et al, 2010 (62)   | Observations without control           | Random/<br>Representative  | Yes                        | ICD-9-CM     | 91825   | Yes                | Mixed       | Mixed  | Both                 | US          | 12             |
| Hoge et al, 2004 (5)              | Observations without control           | Non-random/<br>Convenience | Yes                        | PCL          | 6201    | Yes                | Combat      | Mixed  | Iraq                 | US          | 9              |
| Hoge et al, 2006 (22)             | Observations without control           | Random/<br>Representative  | Yes                        | PC-PTSD      | 238938* | Yes                | Combat      | Mixed  | Both                 | US          | 11             |
| Hoge et al, 2008 (63)             | Observations without control           | Non-random/<br>Convenience | No                         | PCL          | 2525    | No                 | Combat      | Mixed  | Iraq                 | US          | 6              |
| Jones et al, 2012 (64)            | Cohort/<br>Case control/<br>Population | Non-random/<br>Convenience | Yes                        | PCL          | 1431    | Yes                | Mixed       | Mixed  | Afghanistan          | UK          | 7              |
| Kim et al, 2010 (65)              | Cohort/<br>Case control/<br>Population | Non-random/<br>Convenience | Yes                        | PCL          | 10386   | No                 | Combat      | Mixed  | Iraq                 | US          | 8              |

| Ref.                        | Type of study                          | Selection method           | Aimed to examine PTSD rate | PTSD Measure                    | N     | Response rate >60% | Combat role            | Gender | Theatre of operation | Country | Quality rating |
|-----------------------------|----------------------------------------|----------------------------|----------------------------|---------------------------------|-------|--------------------|------------------------|--------|----------------------|---------|----------------|
| Kline et al, 2010 (66)      | Cohort/<br>Case control/<br>Population | Non-random/<br>Convenience | Yes                        | PCL                             | 2543  | Yes                | Mixed                  | Mixed  | Iraq                 | US      | 8              |
| Lapierre et al, 2007 (67)   | Cohort/<br>Case control/<br>Population | Non-random/<br>Convenience | Yes                        | SPTSS                           | 4089  | No                 | Combat                 | Mixed  | Both                 | US      | 6              |
| Luxton et al, 2011 (68)     | Cohort/<br>Case control/<br>Population | Non-random/<br>Convenience | No                         | PC-PTSD                         | 2717  | Yes                | Combat                 | Mixed  | Iraq                 | US      | 6              |
| Maguen et al, 2010 (24)     | Cohort/<br>Case control/<br>Population | Random/<br>Representative  | No                         | PC-PTSD                         | 2797  | Yes                | Both                   | Mixed  | Iraq                 | US      | 6              |
| Maguen et al, 2012 (30)     | Observations<br>without control        | Random/<br>Representative  | Yes                        | PC-PTSD                         | 7251  | Yes                | Combat                 | Mixed  | Both                 | US      | 11             |
| Marshall et al, 2012 (69)   | Cohort/<br>Case control/<br>Population | Non-random/<br>Convenience | Yes                        | PCL-C                           | 963   | No                 | Mixed                  | Mixed  | Iraq                 | US      | 6              |
| Martin, 2007 (70)           | Observations<br>without control        | Random/<br>Representative  | Yes                        | ICD-9-<br>CM/DD<br>Form<br>2900 | 91408 | Yes                | Mixed                  | Mixed  | Iraq                 | US      | 11             |
| Milliken et al, 2007 (45)   | Cohort/<br>Case control/<br>Population | Random/<br>Representative  | Yes                        | PC-PTSD                         | 88235 | Yes                | Combat                 | Mixed  | Iraq                 | US      | 10             |
| Mulligan et al, 2010 (71)   | Observations<br>without control        | Non-random/<br>Convenience | Yes                        | PCL-C                           | 611   | Yes                | Mixed                  | Mixed  | Iraq                 | UK      | 8              |
| Mulligan et al, 2012 (72)   | Cohort/<br>Case control/<br>Population | Random/<br>Representative  | Yes                        | PCL-C                           | 2443  | Yes                | Mixed                  | Mixed  | Afghanista<br>n      | UK      | 9              |
| Peterson et al, 2010 (73)   | Cohort/<br>Case control/<br>Population | Random/<br>Representative  | Yes                        | PC-PTSD                         | 5367  | Yes                | Non-<br>Combata<br>nts | Mixed  | Iraq                 | US      | 10             |
| Phillips et al, 2010 (25)   | Cohort/<br>Case control/<br>Population | Random/<br>Representative  | Yes                        | PCL                             | 706   | No                 | Combat                 | Male   | Both                 | US      | 8              |
| Pietrzak et al, 2009 (74)   | Cohort/<br>Case control/<br>Population | Non-random/<br>Convenience | Yes                        | PCL-M                           | 272   | No                 | Mixed                  | Mixed  | Both                 | US      | 4              |
| Polusny et al, 2011(a) (75) | Observations<br>without control        | Non-random/<br>Convenience | Yes                        | PCL-M                           | 953   | No                 | Combat                 | Mixed  | Iraq                 | US      | 6              |

| Ref.                        | Type of study                    | Selection method        | Aimed to examine PTSD rate | PTSD Measure | N      | Response rate >60% | Combat role       | Gender | Theatre of operation | Country     | Quality rating |
|-----------------------------|----------------------------------|-------------------------|----------------------------|--------------|--------|--------------------|-------------------|--------|----------------------|-------------|----------------|
| Polusny et al, 2011(b) (76) | Observations without control     | Non-random/ Convenience | Yes                        | PCL-M        | 522    | Yes                | Combat            | Mixed  | Iraq                 | US          | 8              |
| Riviere et al, 2011 (77)    | Cohort/ Case control/ Population | Non-random/ Convenience | Yes                        | PCL          | 4034   | Yes                | Combat            | Mixed  | Iraq                 | US          | 7              |
| Rona et al, 2006 (78)       | Observations without control     | Random/ Representative  | Yes                        | PCL          | 1885   | Yes                | Mixed             | Mixed  | Iraq                 | UK          | 11             |
| Schell et al, 2008 (43)     | Cohort/ Case control/ Population | Random/ Representative  | Yes                        | PCL-M        | 1965   | No                 | Mixed             | Mixed  | Both                 | US          | 8              |
| Shen et al, 2009 (79)       | Observations without control     | Non-random/ Convenience | Yes                        | PC-PTSD      | 112720 | Yes                | Non-combat (Navy) | Mixed  | Both                 | US          | 11             |
| Shen et al, 2010 (80)       | Observations without control     | Random/ Representative  | Yes                        | ICD-9        | 678227 | Yes                | Mixed             | Mixed  | Both                 | US          | 11             |
| Smith et al, 2008 (44)      | Observations without control     | Random/ Representative  | Yes                        | PCL          | 50184  | No                 | Mixed             | Mixed  | Both                 | US          | 11             |
| Thomas et al, 2010 (42)     | Observations without control     | Non-random/ Convenience | Yes                        | PCL          | 18305  | Yes                | Combat            | Mixed  | Iraq                 | US          | 9              |
| Van Zuiden et al, 2012 (81) | Cohort/ Case control/ Population | Non-random/ Convenience | Yes                        | SRIP         | 526    | Yes                | Mixed             | Male   | Afghanistan          | Netherlands | 8              |
| Vasterling et al, 2010 (82) | Cohort/ Case control/ Population | Random/ Representative  | Yes                        | PCL-C        | 774    | Yes                | Combat            | Mixed  | Iraq                 | US          | 11             |
| Warner et al, 2011(a) (83)  | Observations without control     | Non-random/ Convenience | Yes                        | PC-PTSD      | 3502   | Yes                | Combat            | Mixed  | Iraq                 | US          | 8              |
| Warner et al, 2011 (b) (84) | Observations without control     | Random/ Representative  | Yes                        | PCL-M        | 421    | Yes                | Combat            | Mixed  | Iraq                 | US          | 6              |
| Wood et al, 2011 (85)       | Observations without control     | Non-random/ Convenience | No                         | PCL          | 1925   | Yes                | Combat            | Mixed  | Iraq                 | US          | 6              |
| Woodhead et al, 2012 (13)   | Observations without control     | Random/ Representative  | Yes                        | PCL          | 4986   | No                 | Mixed             | Mixed  | Both                 | UK          | 8              |
| Wright et al, 2012 (86)     | Cohort/ Case control/ Population | Non-random/ Convenience | Yes                        | PCL          | 522    | Yes                | Combat            | Mixed  | Iraq                 | US          | 8              |
